# Supplementary material for: Measurements of Bone Health after Thyroid-Stimulating Suppression Therapy in Postmenopausal Women with Differentiated Thyroid Carcinoma: Bone Mineral Density versus the Trabecular Bone Score
Source: MDPI journal article supplement (doi:10.3390/jcm10091964), 2021-05-03
Supplement: s1 [file s1]

## Supplementary Table & Figure

**Supplementary Table 1.** Changes of BMD and TBS in patients with osteoporosis

|                            | Suppression (-) | Suppression (+) | <i>p</i> -value |
|----------------------------|-----------------|-----------------|-----------------|
| L-BMD (g/cm <sup>2</sup> ) |                 |                 |                 |
| Baseline                   | 0.878 ± 0.155   | 0.889 ± 0.148   | 0.705           |
| Year 2                     | 0.880 ± 0.140   | 0.890 ± 0.108   | 0.68            |
| Year 4                     | 0.898 ± 0.134   | 0.901 ± 0.124   | 0.920           |
| TBS                        |                 |                 |                 |
| Baseline                   | 1.309 ± 0.079   | 1.303 ± 0.079   | 0.668           |
| Year 2                     | 1.330 ± 0.084   | 1.310 ± 0.009   | 0.241           |
| Year 4                     | 1.338 ± 0.072   | 1.296 ± 0.089   | 0.012           |

Values are presented as mean ± standard deviation for continuous variables. Comparisons between the two groups at baseline, year 2, and year 4 were made using the Student t-test.

Abbreviations: L-BMD, bone mineral density of the lumbar spine; TBS, trabecular bone score.

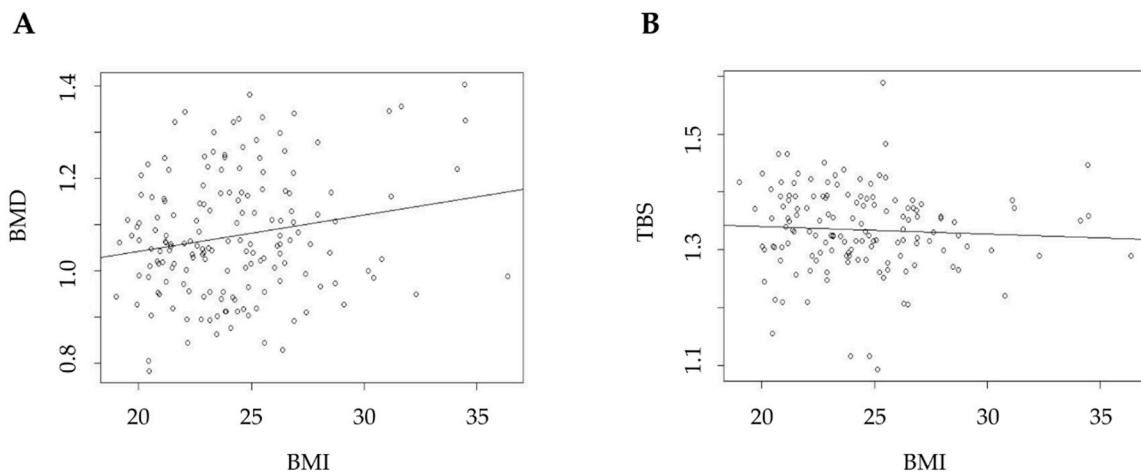

**Supplementary Figure 1.** Correlation analysis between BMI and BMD (A), and between BMI and TBS (B) in postmenopausal DTC patients without osteoporosis.
